# Supplementary material
Source: publisher site journal article supplement (https://kjim.org/upload/media/kjim-2024-022-Supplementary-Fig-1.pdf)
Supplement: Supplementary file 1 [file kjim-2024-022-Supplementary-Fig-1.pdf]

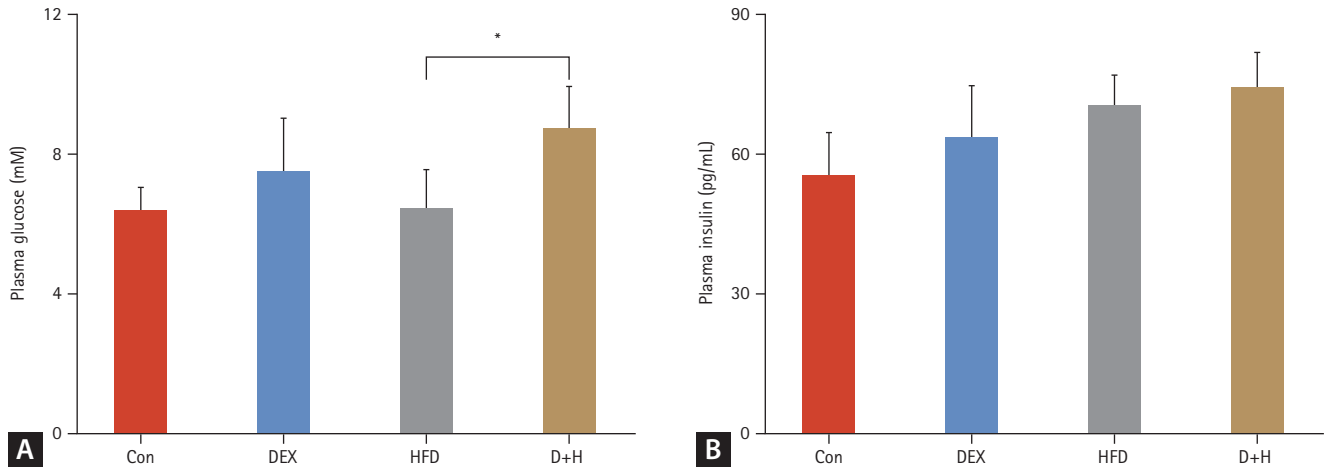

**Supplementary Figure 1.** Effect of DEX treatment on plasma glucose and insulin. (A, B) Plasma glucose and insulin levels in each group. The Con group was intraperitoneally injected with saline only. The mice in the DEX group were intraperitoneally injected with DEX 2.5 mg/kg once daily at 09:00 AM. HFD mice were fed HFD. D+H mice were intraperitoneally injected with DEX 2.5 mg/kg once daily at 09:00 AM and fed HFD. Data are expressed as mean  $\pm$  standard deviation. DEX, dexamethasone; HFD, high-fat diet; D+H, DEX + HFD. \*Indicated  $p < 0.05$ , difference among groups.
